# Supplementary material for: Hardwood seedling establishment below Aleppo pine depends on thinning intensity in two Mediterranean sites
Source: Springer Nature journal article supplement (doi:10.1007/s13595-015-0495-4), 2015-06-29
Supplement: MOESM1 [file 13595_2015_495_MOESM1_ESM.pdf]

## Electronic Supplementary Resources

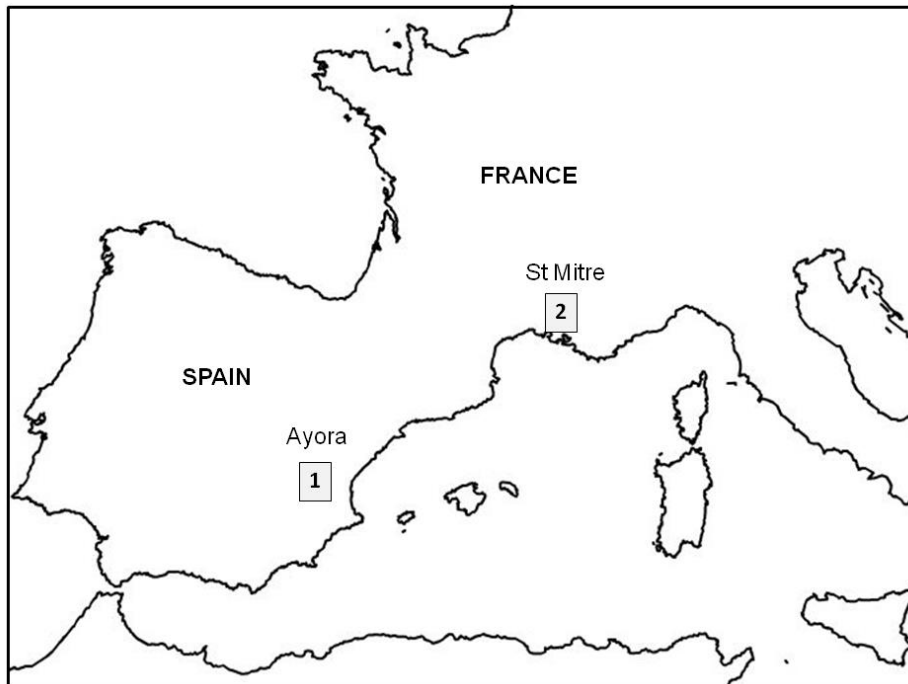

**Online Resource 1: Map of the two experimental sites.** 1= Ayora, Valencia province in Spain. 2 = St-Mitre-les-Remparts, Bouches-du-Rhône département in France.

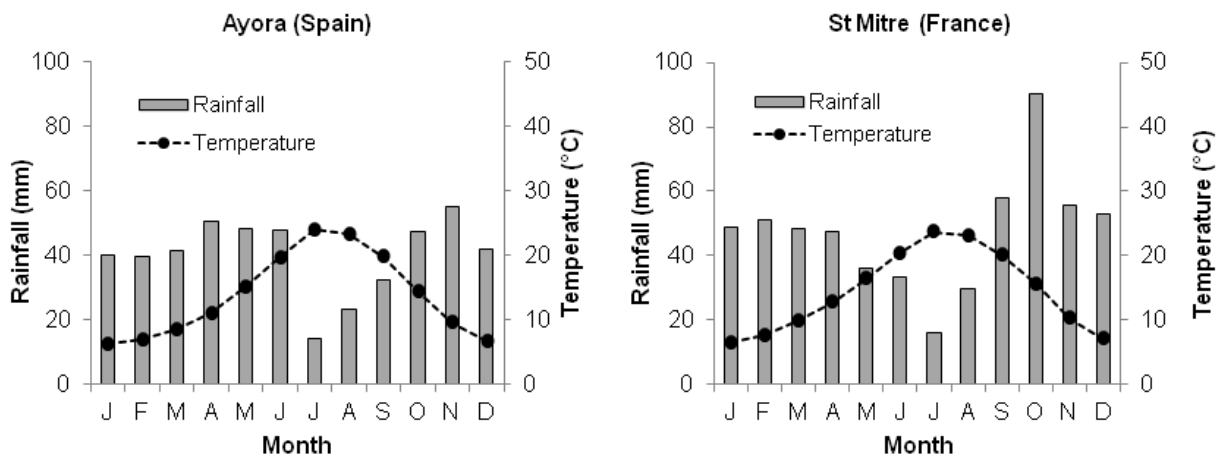

**Online Resource 2: Ombrothermic diagram of the two sites based on historical records (1961-1991).** Data are from the Ayora (Spain) and Istres (10 km North-West of St-Mitre, France) weather stations.

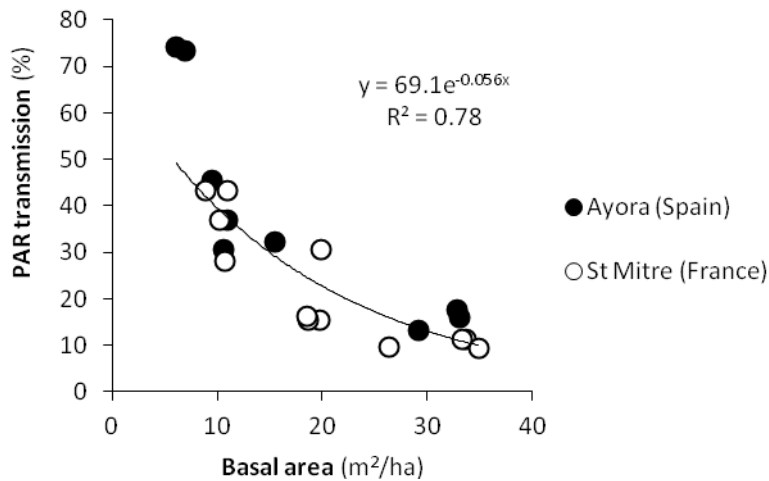

**Online Resource 3: Photosynthetically active radiation (PAR) transmission as a function of stand basal area.** Each point is the mean PAR transmission relative to the open sites in a given plot (black points: Ayora, white points: St Mitre).

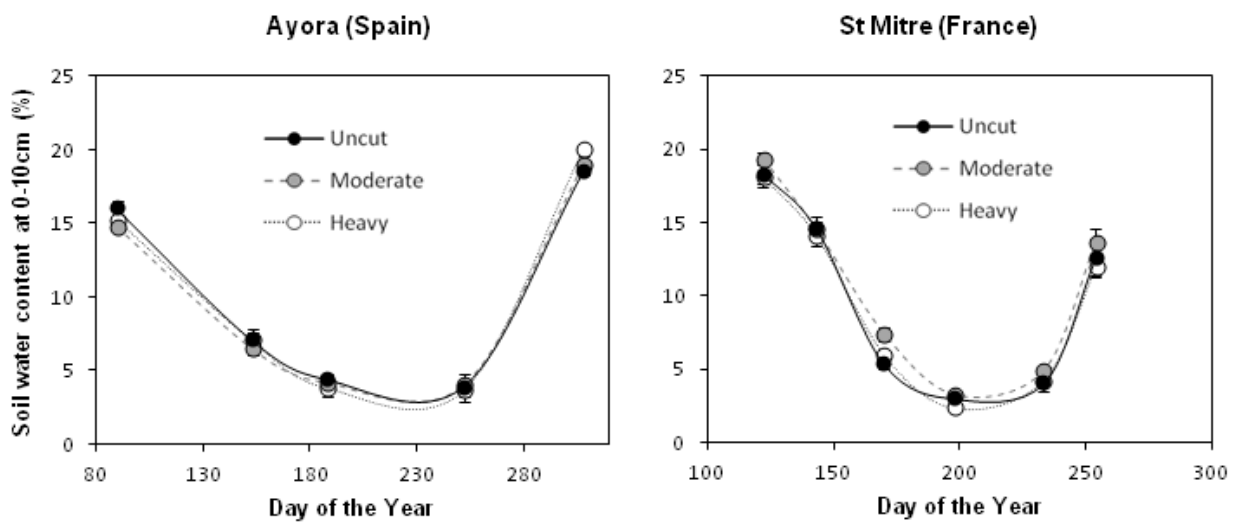

**Online Resource 4: Soil water content in the upper layer (0–10 cm).** Points are means of 9–15 measurements in each treatment (black points: uncut stands, grey points: moderate thinning regime, white points: heavy thinning regime). Bars represent the standard error. Thinning treatment had no effects on soil water content in the upper layer (repeated-measures ANOVA,  $p > 0.05$ )
